# Supplementary material for: Pharmacological Inhibition of MALT1 Protease Leads to a Progressive IPEX-Like Pathology
Source: PubMed Central journal article supplement (PMC7203682; doi:10.3389/fimmu.2020.00745), 2020-04-30
Supplement: Data_Sheet_2.pdf [file Data_Sheet_2.pdf]

# Supplementary Figure 1

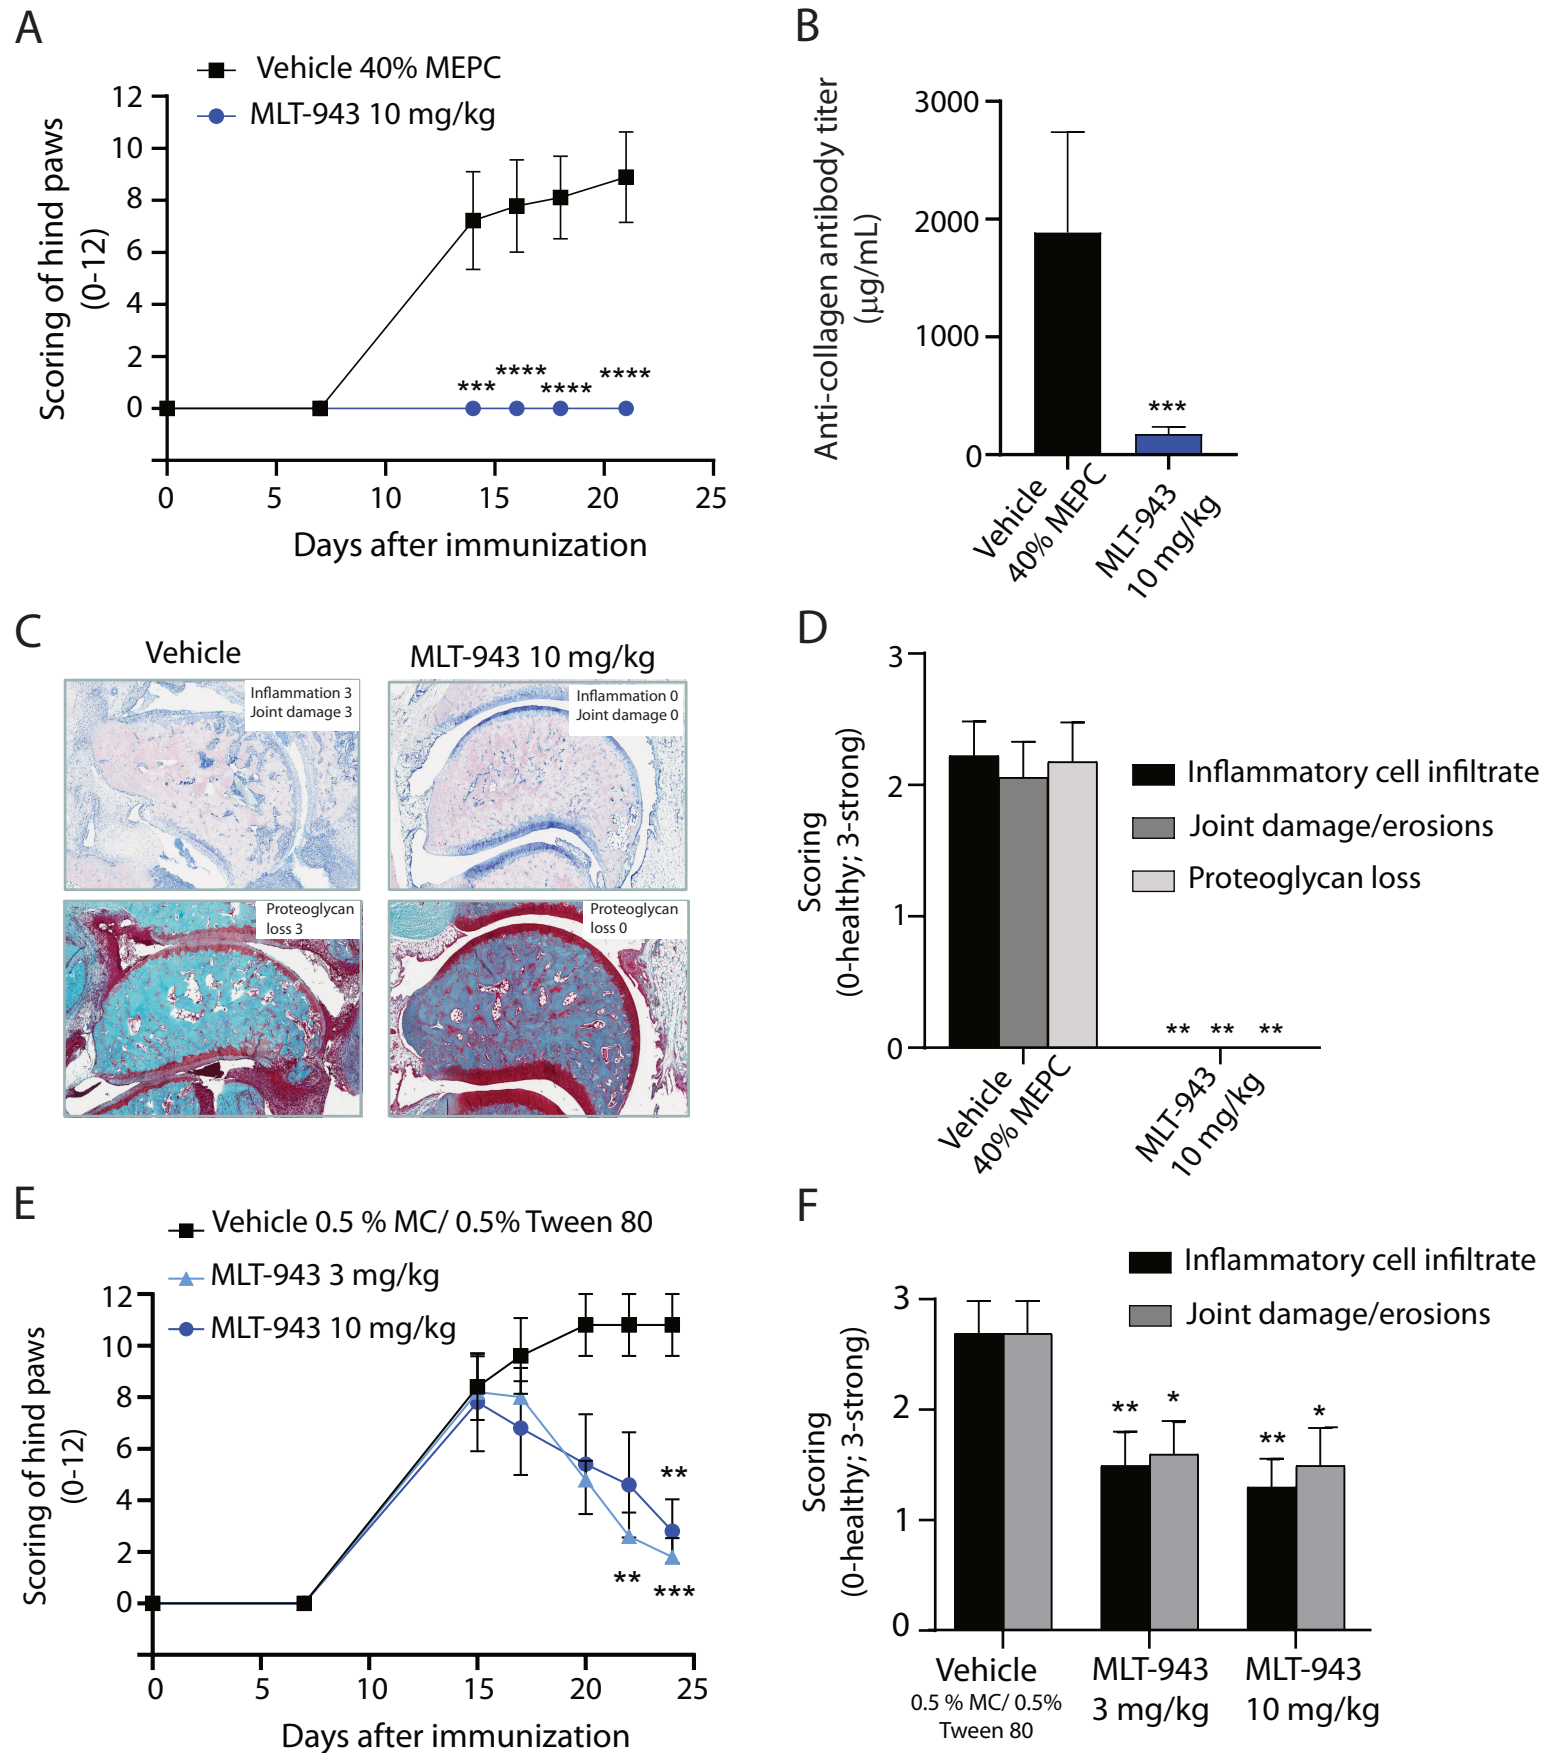

**Supplementary Figure 1:** Rats were immunized on day 0 and boosted on day 7 with collagen in IFA. **A)-D)** Compound was given p.o. daily from day 0 to day 20. **A)** Graphs showing hind paw swelling (mean±SEM) of rats during collagen-induced arthritis. **B)** Rat anti-collagen antibodies were measured in serum on day 21 (mean ± SEM). **C)** Histo-pathological scoring of hind paws based on staining with Giemsa for detection of inflammatory cell infiltrates and bone erosion, and with safranin O for proteoglycan loss indicating cartilage damage. **D)** Quantification of histological scoring. **E)-F)** Compound was given p.o. daily from day 15 to day 23. **E)** Graphs showing hind paw swelling (mean±SEM). **F)** Histo-pathological scoring of hind paws as in D). Statistics: 2-way ANOVA. \* p<0.05, \*\* p<0.01, \*\*\*p<0.001, \*\*\*\*p<0.0001.

## Supplementary Figure 2

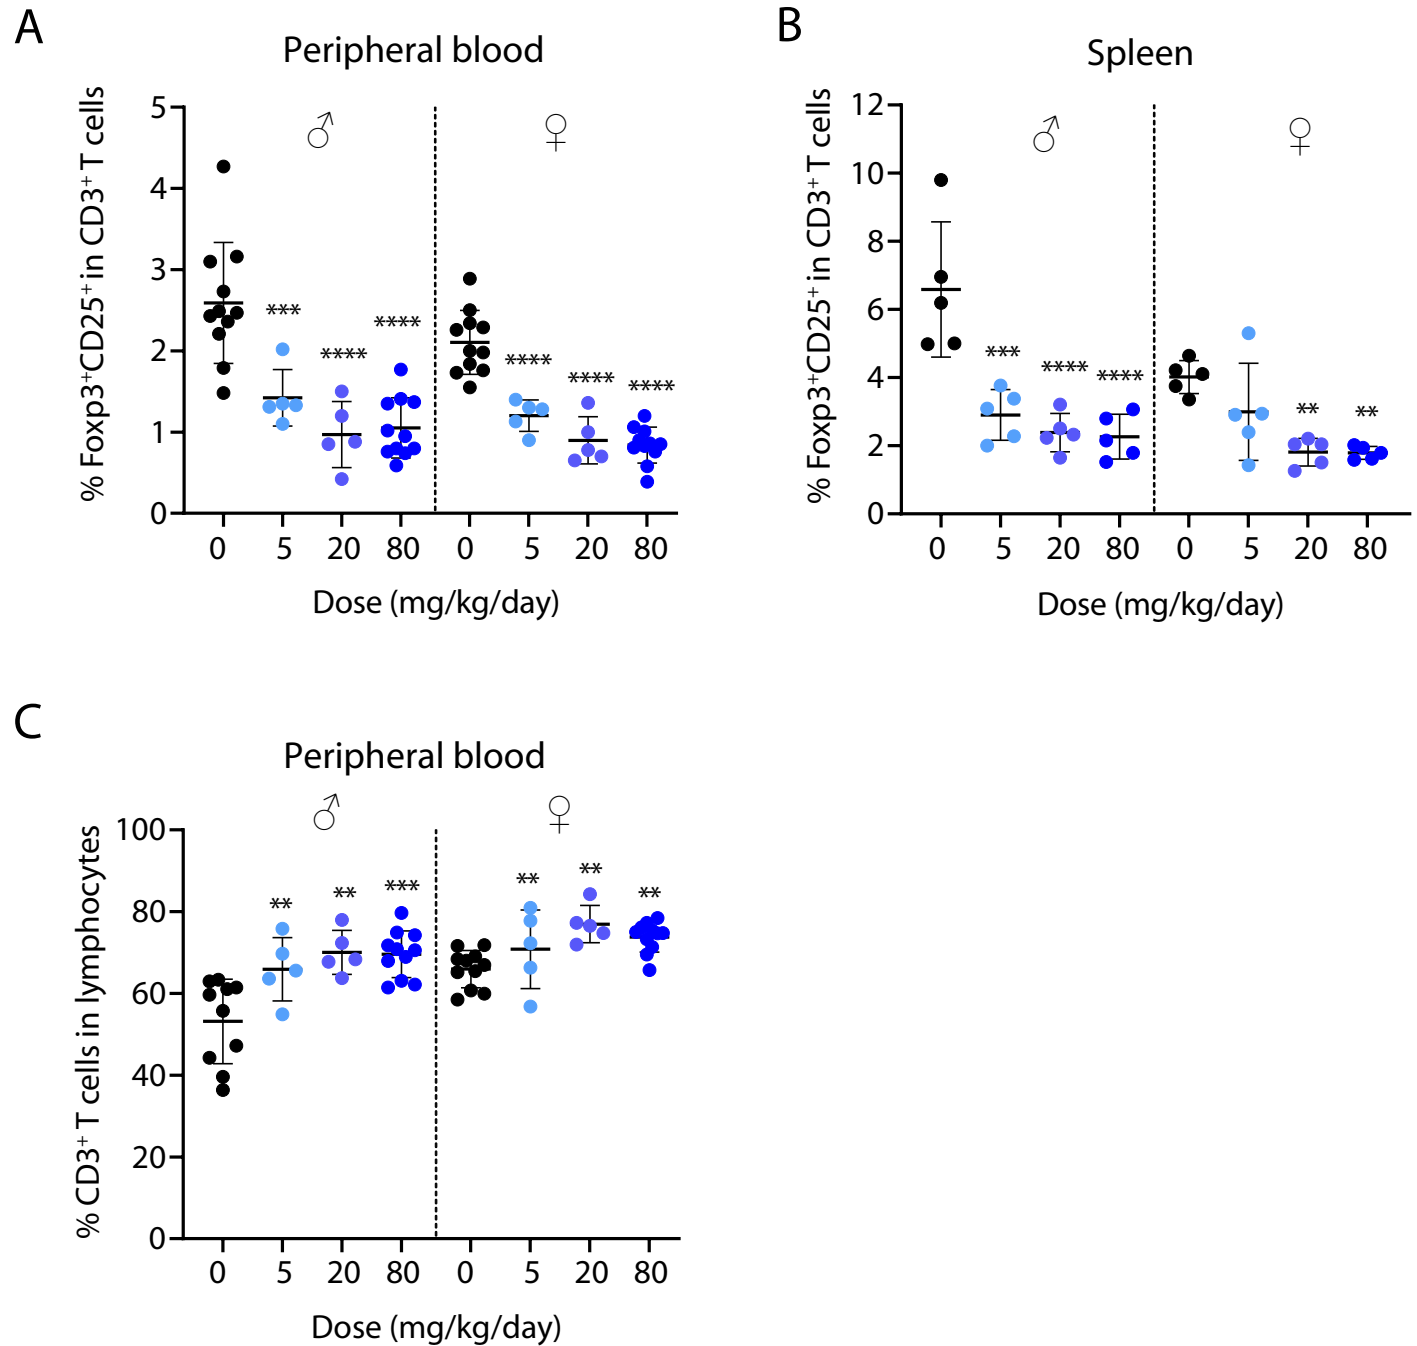

**Supplementary Figure 2.** Four weeks pharmacological MALT1 protease inhibition leads to reduced Tregs and increased T cell proportions in rats. **A+B)** Frequency of Foxp3<sup>+</sup>CD25<sup>+</sup> Tregs in **A)** blood and **B)** spleen in male and female rats determined by FACS at time of necropsy (day 25). **C)** Frequency of CD3<sup>+</sup> T cells in blood at time of necropsy (day 25). Each dot represents an individual animal. Lines depict mean  $\pm$  SD. Statistical difference was determined using one-way ANOVA with follow up for significance by multiple comparison tests with Sidak's correction, \* p < 0.05, \*\* p < 0.01, \*\*\* p < 0.001, \*\*\*\* p < 0.0001.



# Supplementary Figure 3

A

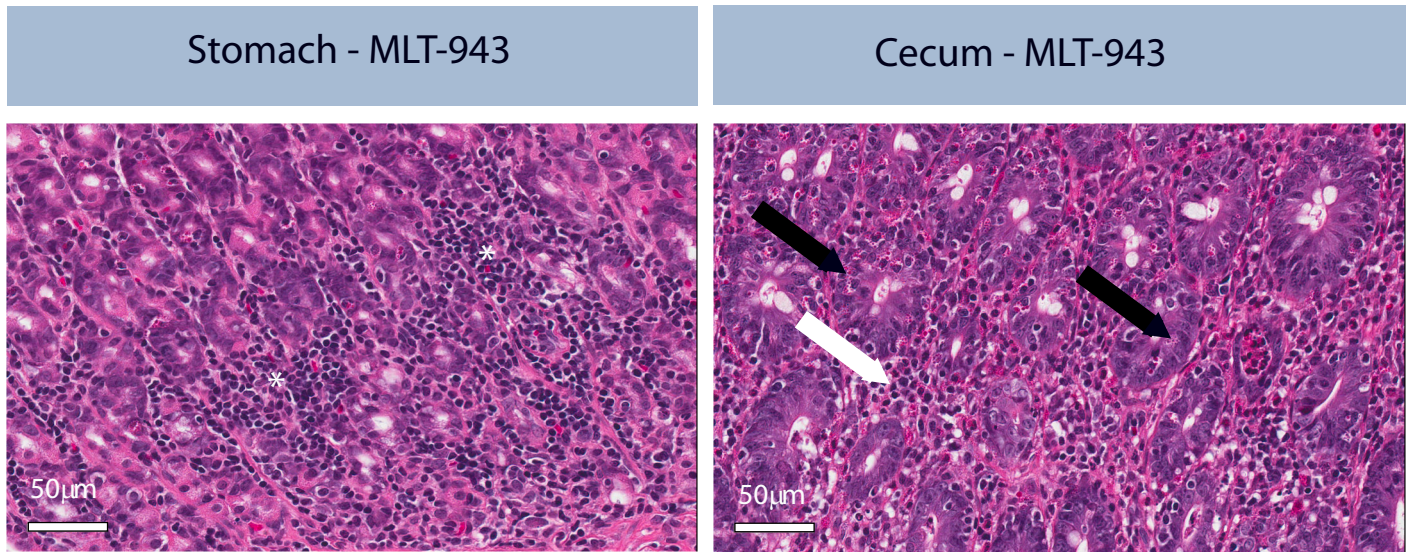

B

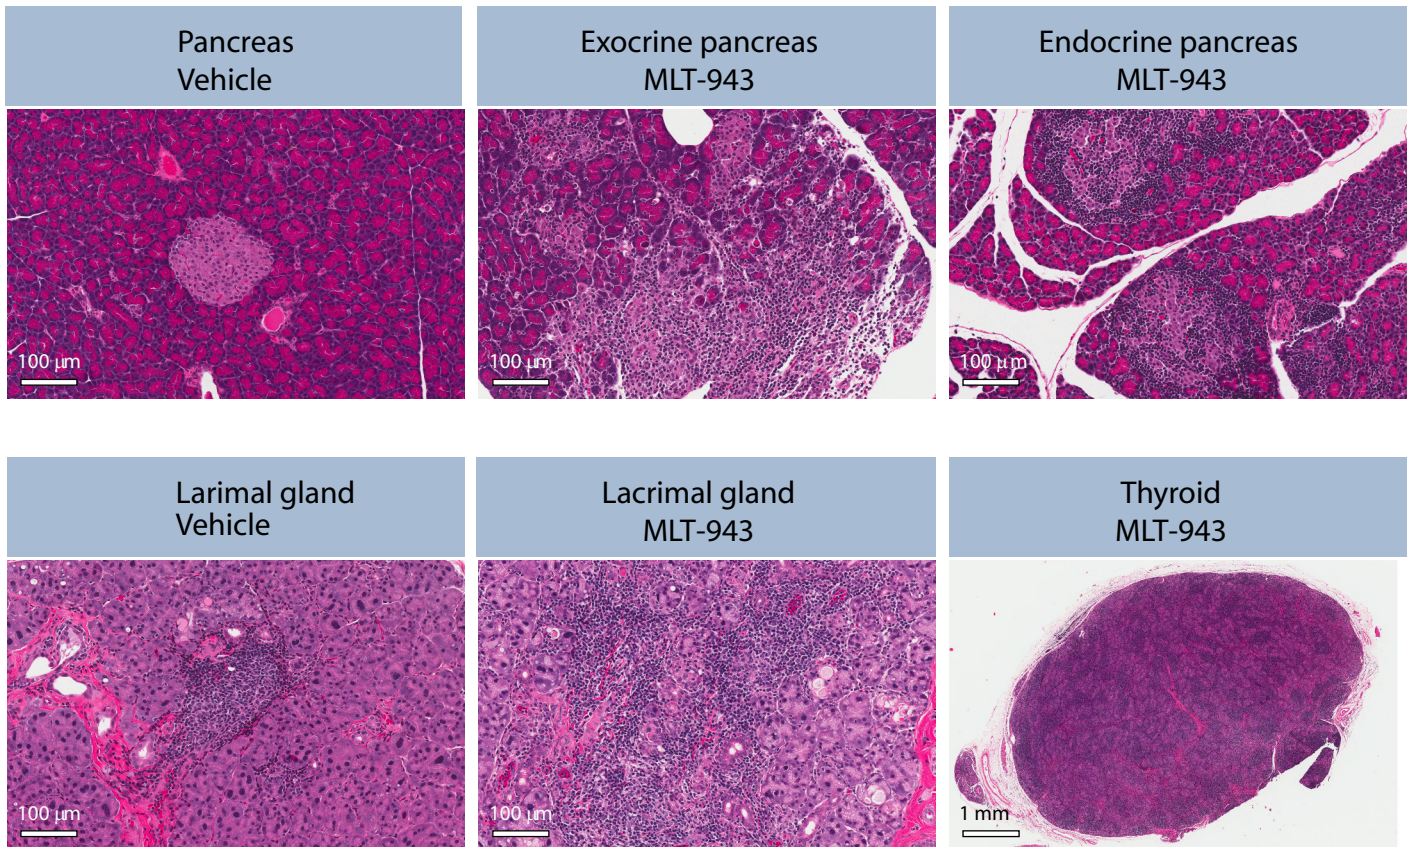

**Supplementary Figure 3** Immune-mediated pathology is induced upon prolonged treatment with MLT-943. Histological alterations in Wistar rats treated with MLT-943 for up to 13 weeks. Sections shown are from both male and female animals of the vehicle or 80 mg/kg/day groups, except for the lacrimal gland MLT-943 section, which was taken from an animal of the 20 mg/kg/day group. Sections taken at necropsy day 86 (week 13) and stained with H&E. **A)** Enlarged version of pictures shown in Figure 3C: MLT-943, 13 week treatment samples in stomach and cecum. Mononuclear cell infiltrates (\*), mixed cell infiltrates (white arrow), globular hyalin bodies (black arrows). **B)** Mononuclear cell infiltration in pancreas, lacrimal glands and the thyroid.

# Supplementary Figure 4

**A**

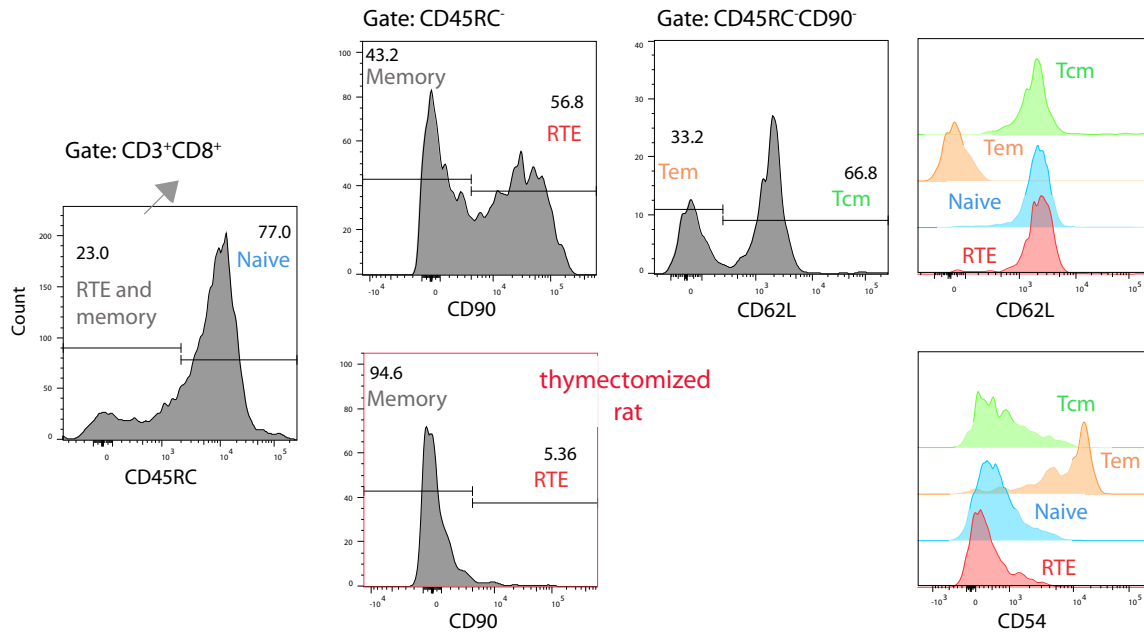

**B**

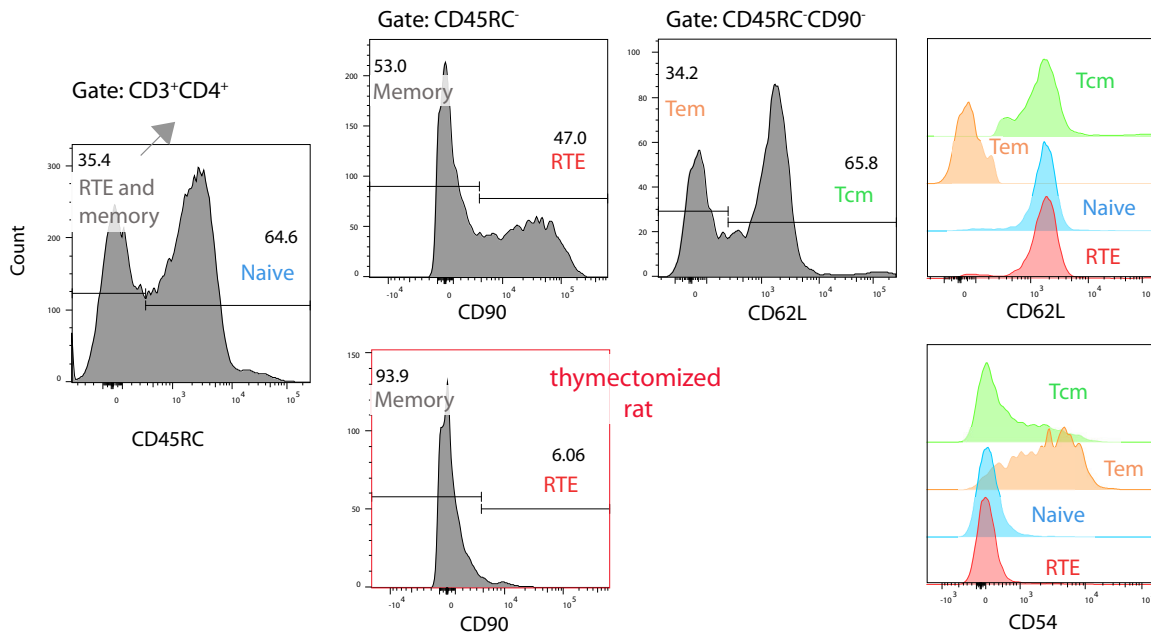

**C**

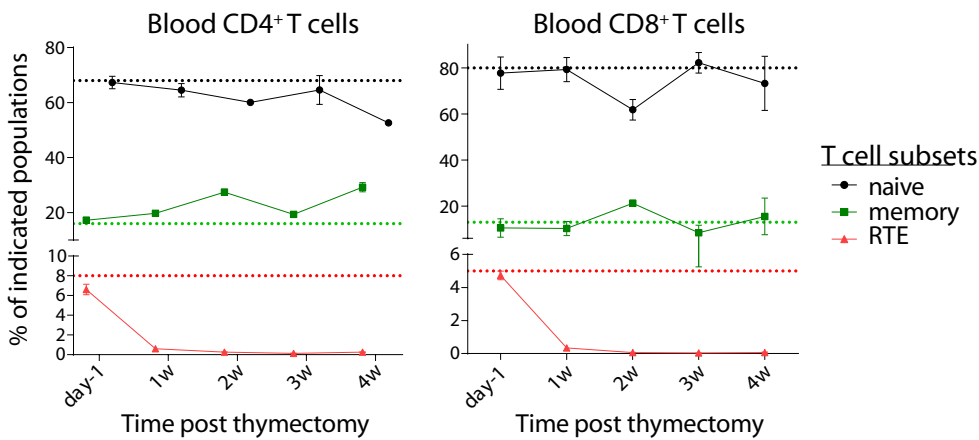

**Supplementary Figure 4.** Gating strategy for identification of recent thymic emigrants (RTEs), naive and memory T cell subsets in rats. **A**) CD3<sup>+</sup>CD8<sup>+</sup> or **B**) CD3<sup>+</sup>CD4<sup>+</sup> T cells were gated on CD45RC to discriminate CD45RC<sup>-</sup> RTEs and memory T cells from CD45RC<sup>+</sup> naive T cells. CD45RC<sup>-</sup> cells were further subdivided into CD90<sup>+</sup> RTEs and CD90<sup>-</sup> memory subsets. Finally, CD45RC<sup>-</sup>CD90<sup>-</sup> memory T cells can be divided into central memory and effector memory based on expression of CD62L (staining example on an euthymic rat). The red-framed plots shows the lack of RTEs in a thymectomized rat. **C**) Kinetic of different T cell subsets in thymectomized rats for CD4<sup>+</sup> T cells (left) and CD8<sup>+</sup> T cells (right). Points depict mean ± SEM.

# Supplementary Figure 5

Spleen

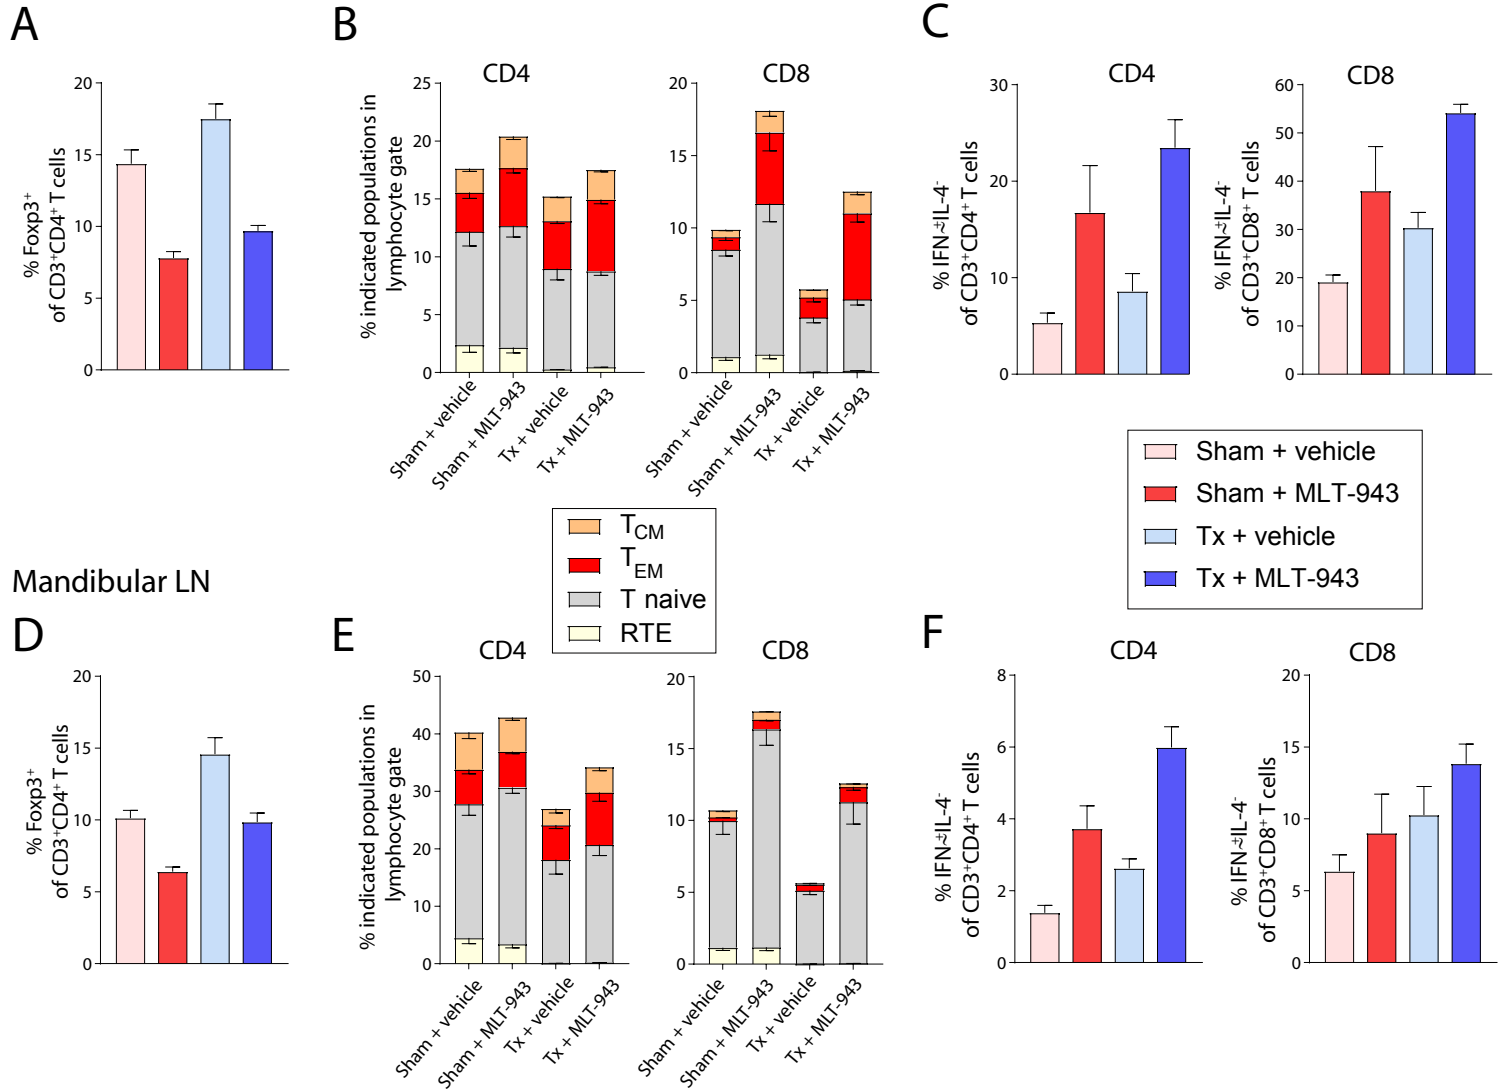

**Supplementary Figure 5.** Effects of MLT-943 treatment on T cell subsets in euthymic versus thymectomized rats. **A-F** Spleens and mandibular LNs from male and female rats were harvested at necropsy (day 63) and analyzed by FACS. **A-C** Frequency of **A**) F<sub>oxp3</sub><sup>+</sup>CD25<sup>+</sup> Tregs and **B**) indicated T cell subpopulations in spleen in the indicated groups. **C**) Percentage of IFN $\gamma$ -producing, IL-4-negative CD4 (left graph) and CD8 (right graph) T cells isolated from spleen, detected by intracellular FACS staining after 4 hours PMA/Ionomycin stimulation ex vivo. **D-F**) T cell populations as described for A-C) isolated from mandibular LNs. Graphs depict means  $\pm$  SEM.



# Supplementary Figure 6

Gate: Lymphocytes

CD4+ T cells

CD21+ B cells

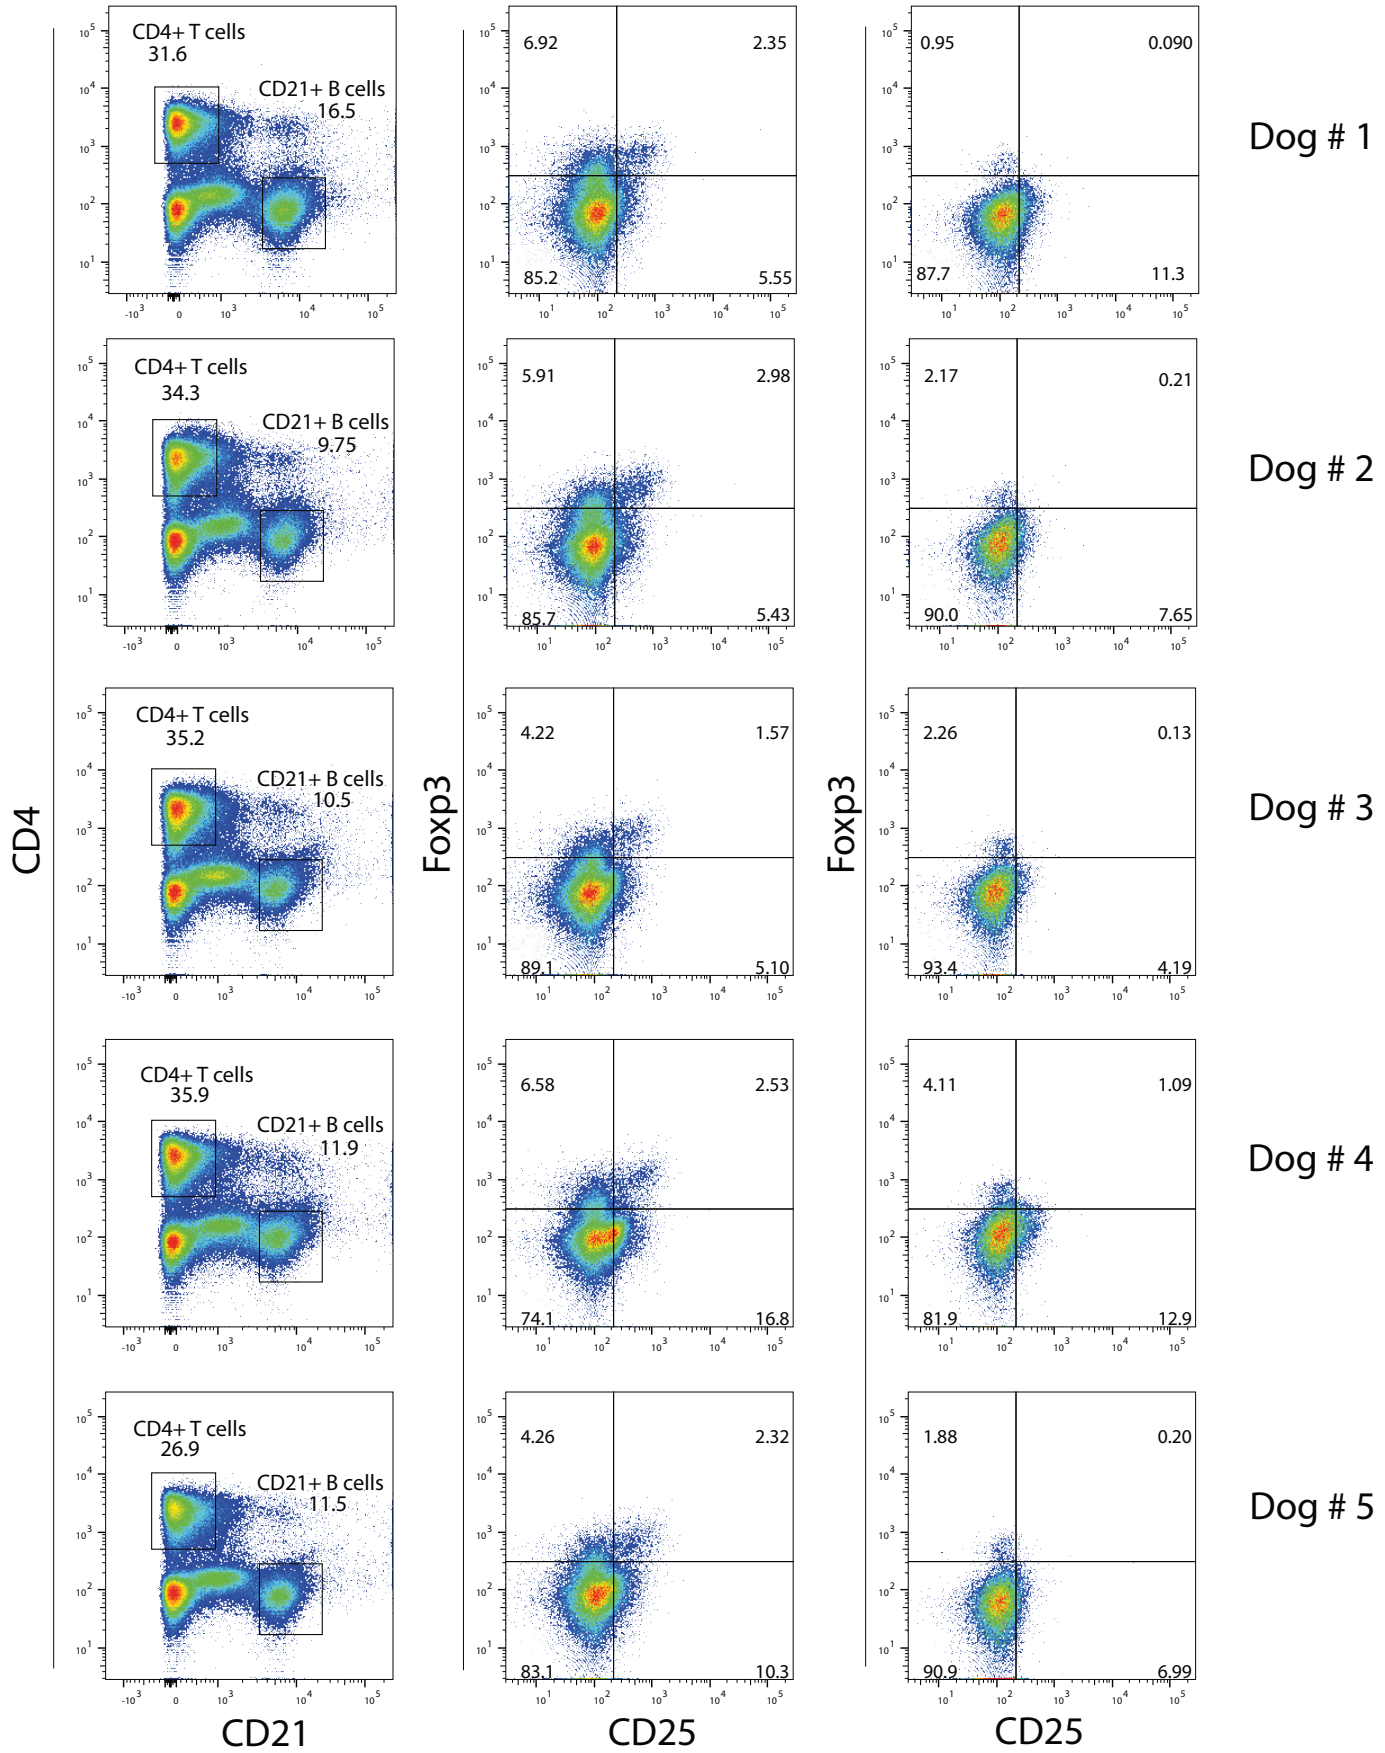

**Supplementary Figure 6.** Gating for Foxp3<sup>+</sup>CD25<sup>+</sup> Tregs within CD4<sup>+</sup> T cells in dogs as exemplified in 5 naive dogs. Lymphocytes were separated in CD4<sup>+</sup> T cells and CD21<sup>+</sup> B cells (left panels). CD4<sup>+</sup> T cells were further analyzed for Foxp3<sup>+</sup>CD25<sup>+</sup> double-positive Tregs (middle panels). Foxp3 expression on CD21<sup>+</sup> B cells was assessed as negative staining control (right panels).

# Supplementary Figure 7

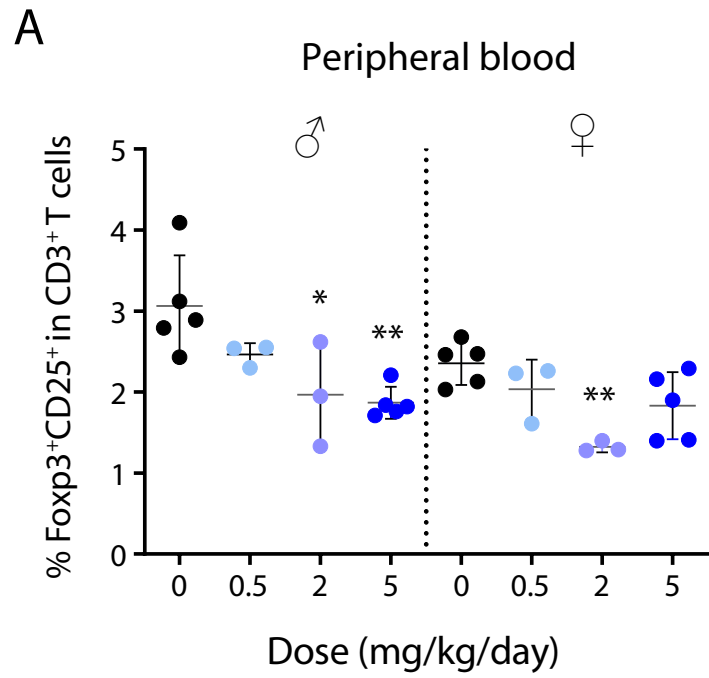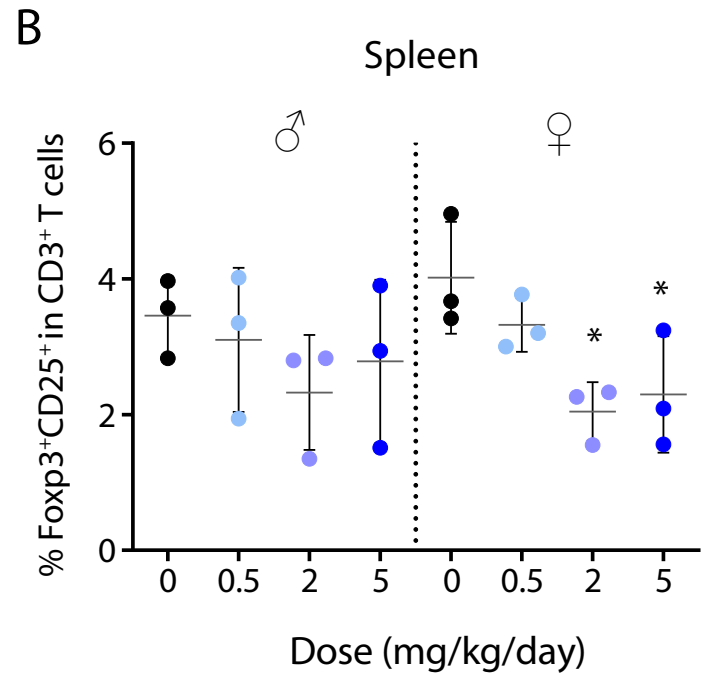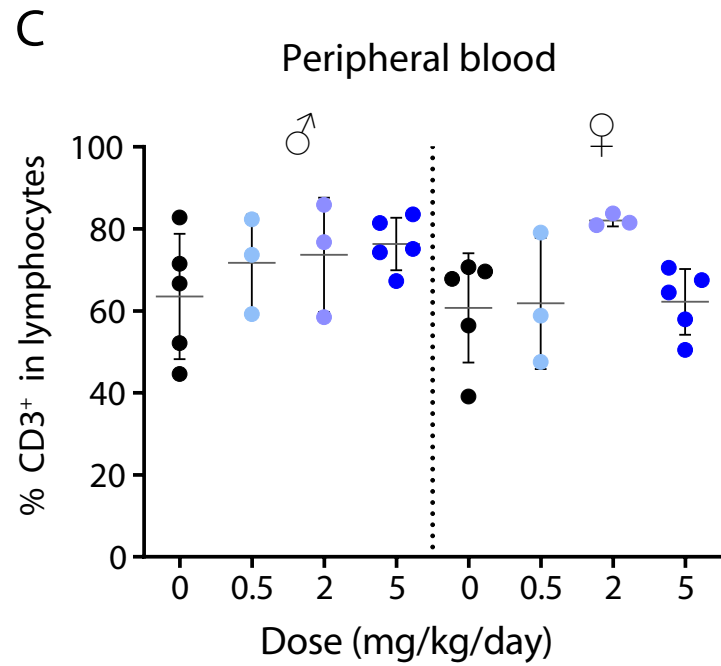

**Supplementary Figure 7.** Four weeks pharmacological MALT1 protease inhibition leads to reduced Treg proportions in dogs. **A+B)** Frequency of Foxp3<sup>+</sup>CD25<sup>+</sup> Tregs in **A)** blood and **B)** spleen in male and female dogs determined by FACS at time of necropsy (day 25). **C)** Frequency of CD3<sup>+</sup> T cells in blood at time of necropsy (day 25). Each dot represents an individual animal. Lines depict mean  $\pm$  SD. Statistical difference was determined using one-way ANOVA with follow up for significance by multiple comparison tests with Sidak's correction, \*  $p < 0.05$ , \*\*  $p < 0.01$ , \*\*\*  $p < 0.001$ , \*\*\*\*  $p < 0.0001$ .
